# Supplementary material for: Adaptation of olfactory receptor abundances for efficient coding
Source: eLife journal article supplement (doi:10.7554/elife.39279), 2019-02-25
Supplement: supp [file elife-39279-supp-v1.zip]

Archive with 1 entries (1 files):
- elife_poa_e39279_Transparent_Reporting_File.pdf
